# Supplementary material
Source: PubMed Central journal article supplement (PMC8821492)
Supplement: 10875_2021_1142_MOESM1_ESM.pdf [file 10875_2021_1142_MOESM1_ESM.pdf]

Supplemental Table 1 Demographic and clinical data of the COVID-19 patients in multiple analyses.

| N                                                                              | All patients |                      |          | Transcriptomic and Systemic cytokine profiling |                      |          | T cell restimulation analysis |                  |          | Antibody profiling (S-flow and peptide ELISA) |                      |          |
|--------------------------------------------------------------------------------|--------------|----------------------|----------|------------------------------------------------|----------------------|----------|-------------------------------|------------------|----------|-----------------------------------------------|----------------------|----------|
|                                                                                | WT (n=36)    | 66<br>Δ382<br>(n=30) | *p value | WT (n=14)                                      | 25<br>Δ382<br>(n=11) | *p value | WT (n=14)                     | 28<br>Δ382(n=14) | *p value | WT (n=20)                                     | 50<br>Δ382<br>(n=30) | *p value |
| <b>Demographics</b>                                                            |              |                      |          |                                                |                      |          |                               |                  |          |                                               |                      |          |
| Mean age, years                                                                | 45 (13)      | 40 (12)              | 0.0925   | 48 (16)                                        | 41 (11)              | 0.2207   | 42 (12)                       | 43 (13)          | 0.8834   | 42 (11)                                       | 41 (12)              | 0.7885   |
| Sex, male                                                                      | 19 (42.9%)   | 18 (72.7%)           | 0.6233   | 6 (42.9%)                                      | 8 (72.7%)            | 0.2270   | 9 (64.3%)                     | 9 (64.3%)        | > 0.999  | 10 (50.0%)                                    | 19 (63.3%)           | 0.3927   |
| <b>Ethnicity</b>                                                               |              |                      |          |                                                |                      |          |                               |                  |          |                                               |                      |          |
| Chinese                                                                        | 31 (86.1%)   | 23 (76.7%)           | 0.355    | 13 (92.9%)                                     | 10 (90.9%)           | > 0.999  | 11 (78.6%)                    | 12 (85.7%)       | > 0.999  | 18 (90.0%)                                    | 23 (76.7%)           | 0.2847   |
| Malay                                                                          | 1 (2.8%)     | 0 (0.0%)             |          | 0 (0.0%)                                       | 0 (0.0%)             |          | 1 (7.1%)                      | 0 (0.0%)         |          | 0 (0.0%)                                      | 0 (0.0%)             |          |
| Indian                                                                         | 0 (0.0%)     | 1 (3.3%)             |          | 0 (0.0%)                                       | 0 (0.0%)             |          | 0 (0.0%)                      | 0 (0.0%)         |          | 0 (0.0%)                                      | 1 (0.0%)             |          |
| Others                                                                         | 4 (11.1%)    | 6 (20.0%)            |          | 1 (7.1%)                                       | 1 (9.1%)             |          | 2 (14.3%)                     | 2 (14.3%)        |          | 2 (10.0%)                                     | 6 (20.0%)            |          |
| <b>Comorbidities</b>                                                           |              |                      |          |                                                |                      |          |                               |                  |          |                                               |                      |          |
| Diabetes                                                                       | 4 (11.1%)    | 0 (0.0%)             | 0.1196   | 3 (21.4%)                                      | 0 (0.0%)             | 0.2300   | 0 (0.0%)                      | 0 (0.0%)         | > 0.999  | 1 (5.0%)                                      | 0 (0.0%)             | 0.4118   |
| Hypertension                                                                   | 8 (22.2%)    | 1 (3.3%)             | 0.0331   | 6 (42.9%)                                      | 1 (9.1%)             | 0.0900   | 0 (0.0%)                      | 2 (14.3%)        | 0.4815   | 2 (10.0%)                                     | 2 (6.7%)             | > 0.999  |
| <b>Laboratory findings</b>                                                     |              |                      |          |                                                |                      |          |                               |                  |          |                                               |                      |          |
| Platelets, x 10 <sup>9</sup> /L                                                | 183.7 (59.9) | 212.1 (56.4)         | 0.0688   | -                                              | -                    | -        | -                             | -                | -        | -                                             | -                    | -        |
| White blood cells, x 10 <sup>9</sup> /L                                        | 4.8 (1.9)    | 4.7 (1.6)            | 0.8467   | -                                              | -                    | -        | -                             | -                | -        | -                                             | -                    | -        |
| Lymphocytes, x 10 <sup>9</sup> /L                                              | 1.2 (0.6)    | 1.4 (0.6)            | 0.2256   | -                                              | -                    | -        | -                             | -                | -        | -                                             | -                    | -        |
| Neutrophils, x 10 <sup>9</sup> /L                                              | 3.0 (1.5)    | 2.7 (1.6)            | 0.4870   | -                                              | -                    | -        | -                             | -                | -        | -                                             | -                    | -        |
| Monocytes, x 10 <sup>9</sup> /L                                                | 0.5 (0.3)    | 0.5 (0.2)            | 0.3675   | -                                              | -                    | -        | -                             | -                | -        | -                                             | -                    | -        |
| <b>Clinical manifestation</b>                                                  |              |                      |          |                                                |                      |          |                               |                  |          |                                               |                      |          |
| Pneumonia                                                                      | 20 (55.6%)   | 15 (50.0%)           | 0.6232   | 10 (71.4%)                                     | 6 (54.6%)            | 0.4341   | 6 (42.9%)                     | 8 (57.1%)        | 0.7064   | 9 (45.0%)                                     | 15 (50.0%)           | 0.779    |
| Hypoxia                                                                        | 6 (16.7%)    | 1 (3.3%)             | 0.1158   | 6 (42.9%)                                      | 1 (9.1%)             | 0.0900   | 0 (0.0%)                      | 0 (0.0%)         | > 0.999  | 0 (0.0%)                                      | 0 (0.0%)             | > 0.999  |
| <b>Clinical severity</b>                                                       |              |                      |          |                                                |                      |          |                               |                  |          |                                               |                      |          |
| No pneumonia (mild)                                                            | 16 (44.4%)   | 15 (50.0%)           |          | -                                              | -                    | -        | -                             | -                | -        | -                                             | -                    | -        |
| Pneumonia, without hypoxia (moderate)                                          | 14 (38.9%)   | 14 (46.7%)           | 0.214    | -                                              | -                    | -        | -                             | -                | -        | -                                             | -                    | -        |
| Pneumonia, with hypoxia (severe)                                               | 6 (16.7%)    | 1 (3.3%)             |          | -                                              | -                    | -        | -                             | -                | -        | -                                             | -                    | -        |
| <b>Length of hospitalization (days)</b>                                        | 13.0 (6.1)   | 13.8 (5.6)           | 0.571    | -                                              | -                    | -        | -                             | -                | -        | -                                             | -                    | -        |
| <b>Interval between symptom onset and sample collection, median days (IQR)</b> | -            | -                    | -        | 9.5 (6.5-12.3)                                 | 6.0 (4.0-9.0)        | 0.2090   | 18.5 (16.8-27.8)              | 19.5 (15.0-25.0) | 0.3595   | -                                             | -                    | -        |
| <b>RNA integrity value of acute sample</b>                                     | -            | -                    | -        | 7.6 (0.8)                                      | 7.7 (0.7)            | 0.6490   | -                             | -                | -        | -                                             | -                    | -        |

Data represented as Mean (S.D), Median (IQR) or n (%). COVID-19, Coronavirus Disease-19; WT, wildtype; SARS-CoV-2, Severe Acute Respiratory Syndrome Coronavirus 2. \*Continuous variables were compared using unpaired t test and categorical variables were compared using Fisher's exact test. Patients in this cohort were classified into three groups based on clinical severity: mild (no pneumonia on chest radiographs [CXR] at baseline and during hospital admission), moderate (pneumonia on CXR without hypoxia), and severe (pneumonia on CXR with hypoxia [desaturation to ≤94%]).

**Supplemental Table 2 Demographics of healthy controls.**

| <b>Variable</b>     | <b>Transcriptomic profiling (n=6)</b> | <b>Systemic cytokine profiling (n=23)</b> | <b>S-flow and peptide ELISA (n=22)</b> |
|---------------------|---------------------------------------|-------------------------------------------|----------------------------------------|
| <b>Demographics</b> |                                       |                                           |                                        |
| Mean age, years     | 39 (11)                               | 51 (17)                                   | 45 (13)                                |
| Sex                 |                                       |                                           |                                        |
| Male                | 4 (66.7%)                             | 9 (39.1%)                                 | 9 (40.9%)                              |
| Female              | 2 (33.3%)                             | 14 (60.9%)                                | 12 (54.5%)                             |

\*Values reported as number (percentage) for categorical variables and mean (SD) for continuous variables.

Supplemental Table 3 Summary statistics of RNA-seq data and mapping results

| Sample Name | Total Sequences (millions) | % Assigned reads | Assigned reads (millions) | % Uniquely mapped reads | Uniquely mapped reads (millions) | Average % GC Content |
|-------------|----------------------------|------------------|---------------------------|-------------------------|----------------------------------|----------------------|
| R10830      | 22.2                       | 50.30%           | 27.5                      | 85.80%                  | 19                               | 48%                  |
| R10831_R    | 17                         | 53.70%           | 22.2                      | 86.10%                  | 14.7                             | 49%                  |
| R10832      | 20                         | 49.30%           | 25.8                      | 86.00%                  | 17.2                             | 49%                  |
| R10833      | 19.8                       | 48.90%           | 26.5                      | 84.70%                  | 16.8                             | 49%                  |
| R10834      | 20.1                       | 48.20%           | 23.8                      | 85.90%                  | 17.3                             | 48%                  |
| R10835_R    | 16.7                       | 55.50%           | 22.7                      | 85.50%                  | 14.3                             | 49%                  |
| R10836      | 22.6                       | 40.10%           | 27                        | 81.60%                  | 18.4                             | 50%                  |
| R10837      | 20.1                       | 45.20%           | 23.7                      | 84.10%                  | 16.9                             | 49%                  |
| R10838      | 23.9                       | 51.20%           | 30.3                      | 86.80%                  | 20.7                             | 48%                  |
| R10839_R    | 18.6                       | 47.60%           | 20.9                      | 85.90%                  | 16                               | 48%                  |
| R10840_R    | 20.6                       | 58.20%           | 28.2                      | 86.90%                  | 17.9                             | 49%                  |
| R10841      | 22.5                       | 37.60%           | 28.1                      | 77.30%                  | 17.4                             | 51%                  |
| R10842      | 21.9                       | 37.80%           | 27.1                      | 76.60%                  | 16.7                             | 51%                  |
| R10843      | 20.2                       | 40.10%           | 24.9                      | 77.30%                  | 15.6                             | 51%                  |
| R10844      | 21.8                       | 48.20%           | 27.8                      | 84.70%                  | 18.5                             | 50%                  |
| R10845      | 22.3                       | 49.90%           | 29                        | 84.70%                  | 18.8                             | 50%                  |
| R10846      | 22.2                       | 56.00%           | 30.8                      | 86.30%                  | 19.2                             | 49%                  |
| R10847      | 20.6                       | 43.80%           | 24.4                      | 82.90%                  | 17.1                             | 49%                  |
| R10848      | 20.1                       | 55.20%           | 26.4                      | 87.20%                  | 17.5                             | 48%                  |
| R10849      | 21.7                       | 50.50%           | 23.8                      | 86.30%                  | 19.2                             | 48%                  |
| R10852_R    | 21.9                       | 24.20%           | 10.3                      | 87.00%                  | 19.1                             | 44%                  |
| R10853_R    | 21.3                       | 53.90%           | 28.6                      | 85.10%                  | 18.1                             | 49%                  |
| R10854_R    | 20                         | 50.20%           | 26.4                      | 84.10%                  | 16.8                             | 47%                  |
| R10855      | 20.5                       | 34.10%           | 23.2                      | 74.10%                  | 15.2                             | 51%                  |
| R10856      | 21.5                       | 58.40%           | 29.4                      | 87.10%                  | 18.7                             | 49%                  |
| R10857      | 22.1                       | 48.30%           | 27.3                      | 84.90%                  | 18.8                             | 50%                  |
| R10858      | 17.3                       | 35.50%           | 21.3                      | 76.70%                  | 13.2                             | 51%                  |
| R10859      | 20.5                       | 47.80%           | 26                        | 84.90%                  | 17.4                             | 49%                  |
| R10860      | 19.5                       | 56.90%           | 27                        | 86.60%                  | 16.9                             | 50%                  |
| R10861      | 20.4                       | 46.00%           | 26.5                      | 83.20%                  | 17                               | 50%                  |
| R10862      | 21.3                       | 59.20%           | 27.9                      | 88.90%                  | 18.9                             | 47%                  |
| R10863_R    | 22.8                       | 59.50%           | 31.2                      | 88.00%                  | 20.1                             | 49%                  |
| R10864_R    | 21.6                       | 62.90%           | 30.9                      | 87.00%                  | 18.8                             | 51%                  |
| R10865      | 23.7                       | 44.80%           | 30.4                      | 81.50%                  | 19.3                             | 51%                  |
| R10866_R    | 24.2                       | 59.60%           | 31.2                      | 88.60%                  | 21.4                             | 49%                  |
| R10867      | 21.1                       | 41.60%           | 21.2                      | 84.00%                  | 17.7                             | 48%                  |
| R10868      | 21.1                       | 52.00%           | 27.7                      | 85.00%                  | 17.9                             | 50%                  |
| R10869      | 24.9                       | 35.70%           | 26.5                      | 76.10%                  | 19                               | 51%                  |
| R10870      | 18.8                       | 56.80%           | 25.3                      | 87.10%                  | 16.3                             | 49%                  |
| R10871_R    | 14.4                       | 41.60%           | 18.1                      | 77.70%                  | 11.2                             | 51%                  |
| R10872_R    | 14                         | 48.20%           | 16.9                      | 84.30%                  | 11.8                             | 49%                  |
| R10873      | 21.4                       | 41.80%           | 24.6                      | 80.10%                  | 17.2                             | 50%                  |
| R10874      | 18.4                       | 54.40%           | 24                        | 85.80%                  | 15.8                             | 48%                  |
| R10875      | 17.6                       | 34.90%           | 17.9                      | 74.60%                  | 13.1                             | 50%                  |
| R10876_2    | 17.6                       | 35.80%           | 19.9                      | 73.50%                  | 12.9                             | 53%                  |
| R10877_2    | 21.2                       | 43.30%           | 25.1                      | 81.30%                  | 17.2                             | 51%                  |
| R10878      | 23.6                       | 50.20%           | 29.1                      | 86.90%                  | 20.5                             | 47%                  |
| R10879      | 23.5                       | 51.20%           | 28.5                      | 86.90%                  | 20.4                             | 47%                  |
| R10880      | 24                         | 47.90%           | 29                        | 85.50%                  | 20.5                             | 48%                  |
| R10881_R    | 24.7                       | 52.70%           | 31                        | 87.10%                  | 21.5                             | 48%                  |
| R10882      | 21                         | 43.00%           | 27.2                      | 77.20%                  | 16.2                             | 47%                  |
| R10883      | 24.1                       | 50.00%           | 31.1                      | 85.20%                  | 20.5                             | 49%                  |
| R10884_R    | 19.6                       | 56.50%           | 27.4                      | 86.10%                  | 16.9                             | 49%                  |
| R10885      | 26.6                       | 44.70%           | 30.5                      | 83.40%                  | 22.2                             | 49%                  |
| R10886_2    | 22.9                       | 40.20%           | 28.3                      | 74.00%                  | 16.9                             | 53%                  |
| R10887      | 22.3                       | 42.20%           | 28                        | 79.00%                  | 17.6                             | 50%                  |

**Supplemental Table 4 Flow cytometry antibodies for T cell Intracellular Panel (1 million PBMCs)**

| No. | Marker     | Colour     | Volume (µL) | Clone     | Cat. No.    | Vendor          |
|-----|------------|------------|-------------|-----------|-------------|-----------------|
| 1   | CD66B      | BV421      | 2           | G10F5     | 562940      | BD Biosciences  |
| 2   | CD45RA     | SB436      | 2           | H100      | 62-0458-42  | Thermo Fisher   |
| 3   | CD27       | PB         | 1           | O323      | 302822      | Biolegend       |
| 4   | NKG2C      | BV480      | 2           | 134591    | 748168      | BD Biosciences  |
| 5   | CD8        | BV605      | 1           | SK1       | 564116      | BD Biosciences  |
| 6   | CD19       | BV605      | 1           | H1B19     | 740394      | BD Biosciences  |
| 7   | VD2        | BV711      | 1           | B6        | 331412      | Biolegend       |
| 8   | CD107A     | BV785      | 2           | H4A3      | 563869      | BD Biosciences  |
| 9   | NKP46      | BB515      | 2           | 9-e2      | 564536      | BD Biosciences  |
| 10  | CD3        | SB550      | 1           | SK7       | 344852      | Biolegend       |
| 11  | CD169      | PERCP5.5   | 5           | 7-239     | 346020      | Biolegend       |
| 12  | HLADR      | APCR700    | 2           | L243      | 307626      | Biolegend       |
| 13  | CD4        | SN685      | 1           | SK3       | 344658      | Biolegend       |
| 14  | CD14       | APC CY7    | 1           | M0P9      | 557831      | BD Biosciences  |
| 15  | VD1        | APC Vio770 | 1           | REA173    | 130-120-578 | Miltenyi Biotec |
| 16  | L/D        | ZOMBIE NIR | 0.5         |           | 423105      | Biolegend       |
| 17  | CXCR5      | PE VIO615  | 1           | J252D4    | 356928      | Biolegend       |
| 18  | CD154      | PE CY5     | 5           | TRAP-1    | 555701      | BD Biosciences  |
| 19  | CD56       | PE CY5.5   | 2           | NCAM16.2  | 35-0567-42  | Thermo Fisher   |
| 20  | CD16       | PEAF700    | 1           | 3G8       | MHCD1624    | Thermo Fisher   |
| 21  | CD45       | BUV805     | 2           | H130      | 612891      | BD Biosciences  |
| 22  | Granzyme B | BV510      | 2.5         | GB11      | 563388      | BD Biosciences  |
| 23  | IFN-γ      | BV570      | 2.5         | 4S.B3     | 502534      | Biolegend       |
| 24  | IL-2       | BV650      | 5           | MQ1-17H12 | 564166      | BD Biosciences  |
| 25  | TNF-α      | BV750      | 2.5         | MAB11     | 566359      | BD Biosciences  |
| 26  | IL-6       | FITC       | 2.5         | MQ2-13A5  | 11-7069-82  | Thermo Fisher   |
| 27  | IL-17a     | AF647      | 10          | N49-653   | 560490      | BD Biosciences  |
| 28  | IL-10      | PE         | 2.5         | JES-9D7   | 501404      | Biolegend       |
| 29  | IL-4       | PECY7      | 2.5         | 8D4-8     | 560672      | BD Biosciences  |











|                    |       |            |                                |             |              |             |             |             |
|--------------------|-------|------------|--------------------------------|-------------|--------------|-------------|-------------|-------------|
| ENSG00000278875.1  | 1802  | AC025809.2 | TEC                            | 5.2466078   | -0.47932121  | 10.22409279 | 0.004710844 | 0.218311104 |
| ENSG00000283384.1  | 3376  | AL138694.1 | lncRNA                         | 5.281720086 | -0.994466553 | 10.11385888 | 0.004897294 | 0.222659797 |
| ENSG00000162062.15 | 2848  | TEDC2      | protein_coding                 | 5.310436248 | -0.377134713 | 8.566506191 | 0.009355856 | 0.28078551  |
| ENSG00000128965.13 | 2051  | CHAC1      | protein_coding                 | 5.346045166 | -0.0012451   | 11.60455763 | 0.003330456 | 0.187179665 |
| ENSG00000227502.3  | 2755  | LINC01268  | lncRNA                         | 5.357834031 | -0.000272502 | 11.14204186 | 0.004450259 | 0.214458329 |
| ENSG00000227181.1  | 1745  | AC107067.2 | lncRNA                         | 5.491399264 | -1.136050444 | 13.92543986 | 0.004570067 | 0.215773794 |
| ENSG00000205837.7  | 2202  | LINC00487  | lncRNA                         | 5.515300304 | 0.064881937  | 29.80943744 | 4.12661E-05 | 0.063559168 |
| ENSG00000183722.9  | 4564  | LHFPL6     | protein_coding                 | 5.5277603   | -0.168637275 | 11.89025074 | 0.002844192 | 0.177002596 |
| ENSG00000115884.11 | 3613  | SDC1       | protein_coding                 | 5.568853488 | 1.910942087  | 26.14848851 | 0.00010162  | 0.065041535 |
| ENSG00000227742.2  | 2704  | CALR4P     | transcribed_unitary_pseudogene | 5.61580431  | -1.373983182 | 20.89378783 | 0.000266502 | 0.077698735 |
| ENSG00000104067.16 | 11265 | TJP1       | protein_coding                 | 5.617993763 | -0.846885133 | 15.9458766  | 0.001157383 | 0.129462221 |
| ENSG00000259319.1  | 4059  | AF111167.2 | lncRNA                         | 5.656386322 | 0.406713563  | 17.65701507 | 0.000433436 | 0.083493325 |
| ENSG00000246375.3  | 2591  | PPM1K-DT   | lncRNA                         | 5.695589778 | -1.170099    | 24.15138111 | 9.45102E-05 | 0.065041535 |
| ENSG00000185585.20 | 6771  | OLFML2A    | protein_coding                 | 5.767212688 | -0.714704927 | 21.8780796  | 0.000291228 | 0.080341116 |
| ENSG00000115155.17 | 7885  | OTOF       | protein_coding                 | 6.288569642 | 3.703149031  | 24.17855822 | 8.17335E-05 | 0.065041535 |
| ENSG00000049130.16 | 6205  | KITLG      | protein_coding                 | 6.339772383 | -1.02651118  | 18.70698841 | 0.001856105 | 0.15097794  |
| ENSG00000233975.1  | 441   | LINC02574  | lncRNA                         | 6.497385309 | -1.153826693 | 18.70004483 | 0.001858307 | 0.15097794  |
| ENSG00000151364.17 | 1899  | KCTD14     | protein_coding                 | 7.001026545 | 0.04032819   | 24.7517518  | 0.000162089 | 0.065041535 |

DEGs, differentially expressed genes; WT, wildtype; SARS-CoV-2, Severe Acute Respiratory Syndrome Coronavirus 2; FC, fold change.







**Supplemental Table 7 Plasma immune mediators of COVID-19 patients at the acute phase of infection (median 8 days PIO; n=25).**

**Log<sub>10</sub> concentration (pg/ml)**

| Cytokine  | Difference |             |               | Healthy Controls (n=23) |
|-----------|------------|-------------|---------------|-------------------------|
|           | WT (n=14)  | Δ382 (n=11) | (WT vs. Δ382) |                         |
| BDNF      | 34.92      | 21.85       | -13.07        | 11.10                   |
| EGF       | 0.17       | 3.63        | 3.46          | 0.40                    |
| Eotaxin   | 16.84      | 14.25       | -2.59         | 26.90                   |
| FGF-2     | 0.18       | 0.18        | 0.00          | 0.20                    |
| GM-CSF    | 0.82       | 0.82        | 0.00          | 1.10                    |
| GRO-α     | 0.05       | 0.05        | 0.00          | 2.50                    |
| HGF*      | 190.00     | 49.13       | -140.90       | 55.50                   |
| IFN-α     | 0.02       | 0.02        | 0.00          | 0.10                    |
| IFN-γ***  | 6.84       | 36.14       | 29.30         | 17.20                   |
| IL-1α     | 0.19       | 0.01        | -0.18         | 0.30                    |
| IL-1β     | 1.90       | 2.21        | 0.31          | 0.80                    |
| IL-1RA*   | 497.60     | 116.40      | -381.30       | 5.00                    |
| IL-2**    | 12.36      | 24.20       | 11.85         | 12.10                   |
| IL-4      | 0.21       | 0.21        | 0.00          | 5.30                    |
| IL-5*     | 0.04       | 2.25        | 2.21          | 0.10                    |
| IL-6      | 5.99       | 1.54        | -4.45         | 0.40                    |
| IL-7      | 0.66       | 0.41        | -0.25         | 0.30                    |
| IL-8      | 0.15       | 0.15        | 0.00          | 0.20                    |
| IL-9      | 2.35       | 2.35        | 0.00          | 2.35                    |
| IL-10     | 0.04       | 0.04        | 0.00          | 0.10                    |
| IL-12p70* | 0.22       | 1.06        | 0.84          | 0.10                    |
| IL-13     | 0.20       | 0.20        | 0.00          | 0.60                    |
| IL-15**   | 9.14       | 1.07        | -8.07         | 1.90                    |
| IL-17A*   | 0.08       | 0.08        | 0.00          | 0.20                    |
| IL-18     | 34.35      | 66.66       | 32.31         | 29.20                   |
| IL-21     | 0.38       | 0.38        | 0.00          | 1.20                    |
| IL-22     | 0.36       | 0.36        | 0.00          | 9.60                    |
| IL-23     | 0.32       | 0.32        | 0.00          | 0.40                    |
| IL-27     | 0.99       | 0.99        | 0.00          | 2.00                    |
| IL-31     | 2.69       | 2.69        | 0.00          | 2.70                    |
| IP-10     | 26.52      | 19.34       | -7.18         | 29.00                   |
| LIF       | 5.61       | 3.48        | -2.13         | 3.10                    |
| MCP-1     | 55.24      | 44.96       | -10.28        | 43.60                   |
| MIP-1α    | 5.38       | 0.47        | -4.91         | 2.00                    |
| MIP-1β*   | 35.81      | 4.38        | -31.43        | 2.80                    |
| PDGF-BB   | 38.96      | 45.43       | 6.48          | 91.40                   |
| PIGF-1    | 0.76       | 8.90        | 8.15          | 4.70                    |
| RANTES    | 42.51      | 66.21       | 23.70         | 100.90                  |
| SCF       | 4.39       | 4.53        | 0.14          | 4.00                    |
| SDF-1α    | 551.90     | 586.50      | 34.60         | 645.90                  |
| TNF-α     | 6.91       | 9.23        | 2.32          | 1.30                    |
| TNF-β     | 2.98       | 2.98        | 0.00          | 2.98                    |
| VEGF-A*   | 94.71      | 37.23       | -57.48        | 1.90                    |
| VEGF-D    | 0.10       | 0.10        | 0.00          | 1.40                    |
| β-NGF     | 0.01       | 0.58        | 0.57          | 2.52                    |

Data presented as median. COVID-19, Coronavirus Disease-19; WT, wild-type; PIO, post-illness onset; BDNF, brain-derived neurotropic factor; EGF, epidermal growth factor; FGF-2, basic fibroblast growth factor; GM-CSF, granulocyte-macrophage colony-stimulating factor; GRO-α, chemokine (C-X-C motif) ligand (CXCL) 1; HGF, hepatocyte growth factor; IFN, interferon; IL, interleukin, IL-1RA, IL-1 receptor antagonist; IP-10, IFN-γ-induced protein 10; LIF, leukemia inhibitory factor; MCP-1, monocyte chemoattractant protein 1; MIP-1α, macrophage inflammatory protein 1α; PDGF-BB, platelet-derived growth factor; PIGF-1, placental growth factor; RANTES, regulated on activation, normal T cell expressed and secreted; SCF, stem cell factor; SDF-1α, stromal cell-derived factor 1α; TNF, tumor necrosis factor; VEGF, vascular endothelial growth factor; β-NGF, beta-nerve growth factor. (\*p < 0.05; \*\*p < 0.01; \*\*\*p < 0.001). ^Majority of the samples have readings below limit of quantitation (LOQ).

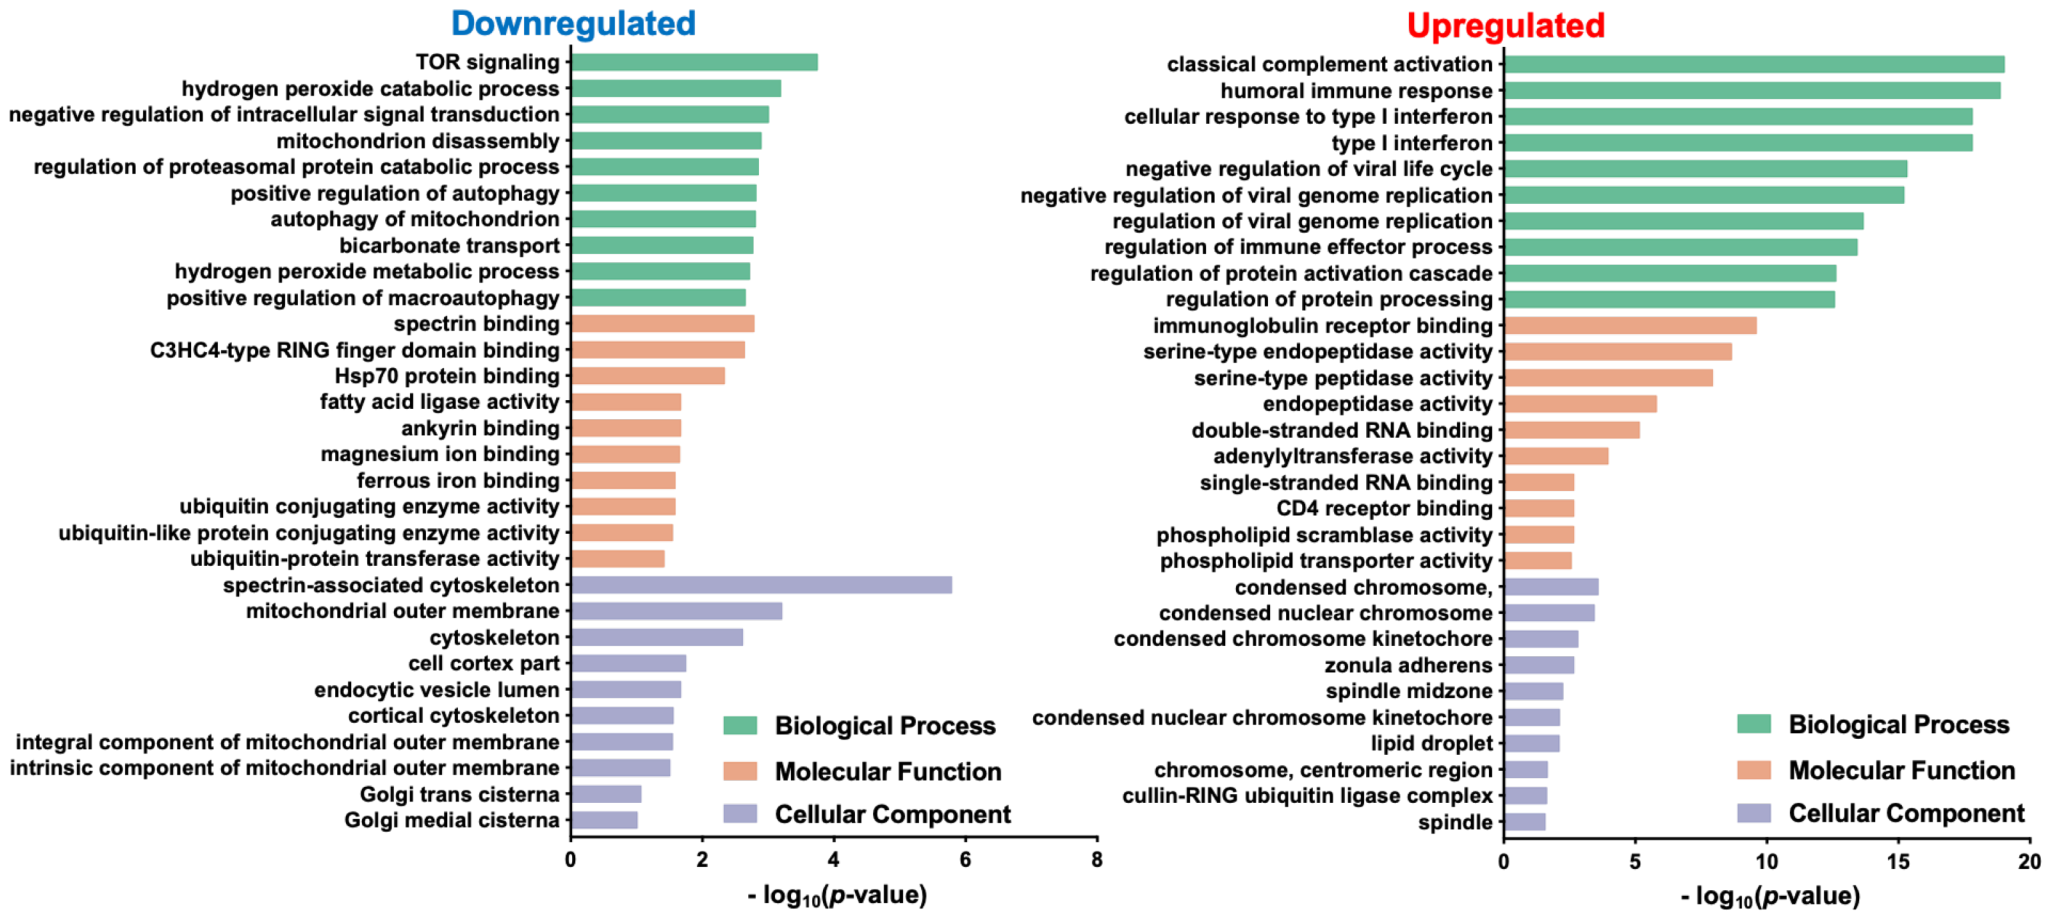

Supplemental Fig. 1

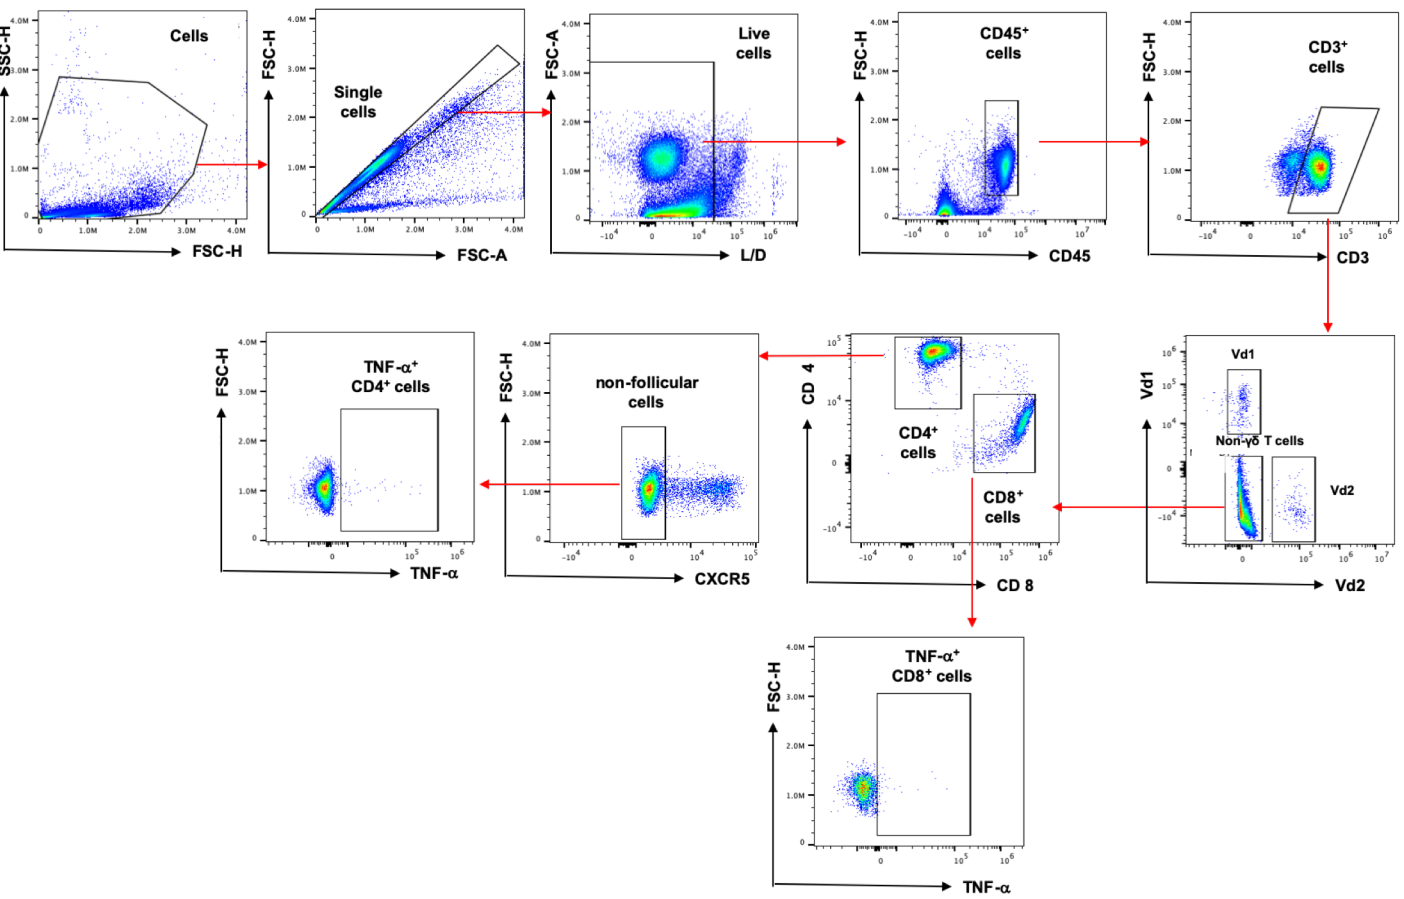

Supplemental Fig. 2

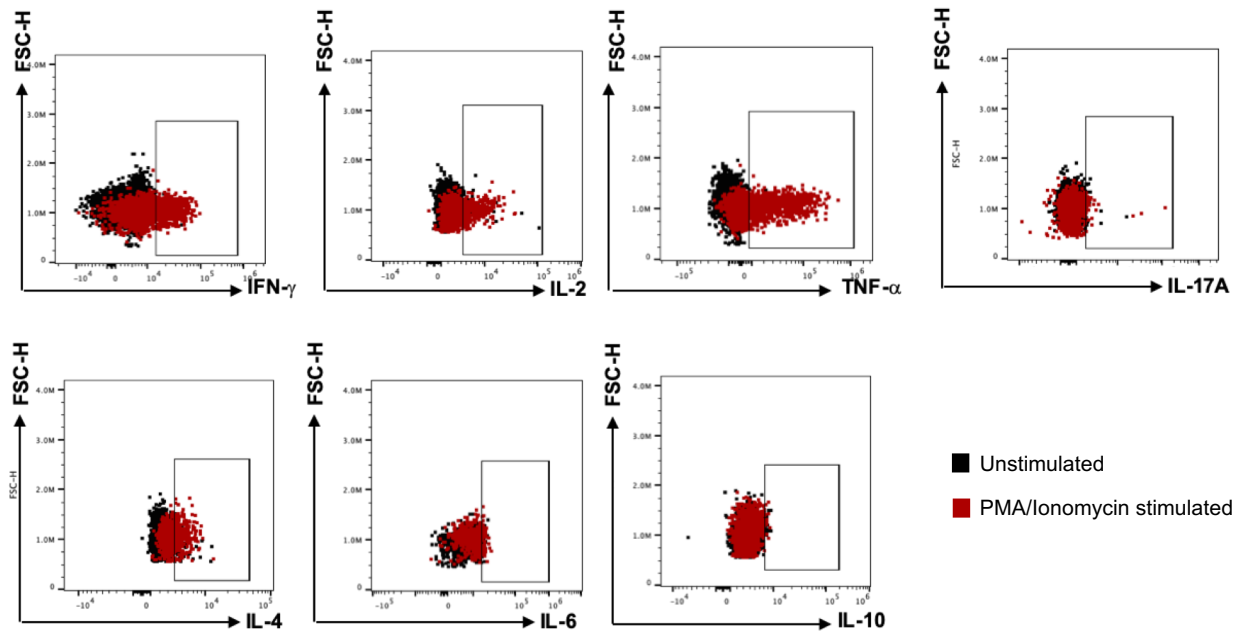

Th<sub>1</sub>

Th<sub>17</sub>

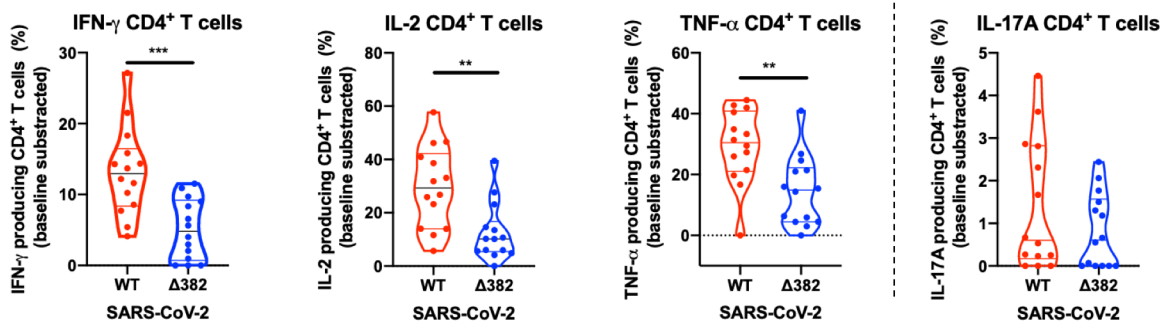

Th<sub>2</sub>

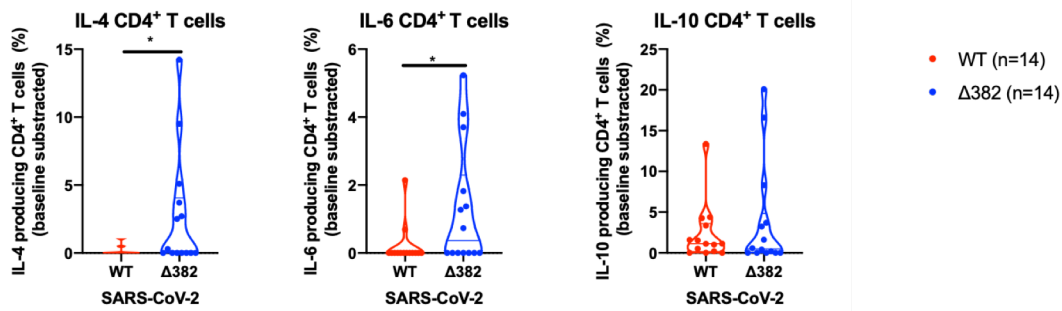

Supplemental Fig. 3
